# Supplementary material for: Diagnostic accuracy of rapid point-of-care tests for diagnosis of current SARS-CoV-2 infections in children: a systematic review and meta-analysis
Source: HighWire-hosted journal article supplement (doi:10.1136/bmjebm-2021-111828), 2022-01-18
Supplement: bmjebm-2021-111828supp001_data_supplement.pdf [file bmjebm-2021-111828supp001_data_supplement.pdf]

## Diagnostic accuracy of rapid point-of-care tests for diagnosis of current SARS-CoV-2 infections in children: A systematic review and meta-analysis

N. Fujita-Rohwerder, L. Beckmann, Y. Zens, A. Verma

### Appendix 1: Supplementary tables and figures

#### Table of contents

|                                                                                                                                                                                                                                                                                                                                                                                                    |    |
|----------------------------------------------------------------------------------------------------------------------------------------------------------------------------------------------------------------------------------------------------------------------------------------------------------------------------------------------------------------------------------------------------|----|
| <b>Table S1:</b> Eligibility criteria for primary studies. ....                                                                                                                                                                                                                                                                                                                                    | 3  |
| <b>Table S2:</b> Data extraction items. ....                                                                                                                                                                                                                                                                                                                                                       | 4  |
| <b>Table S3:</b> Study pool of the systematic review. ....                                                                                                                                                                                                                                                                                                                                         | 6  |
| <b>Table S4:</b> Potentially relevant studies identified through searching clinical study registries. ....                                                                                                                                                                                                                                                                                         | 7  |
| <b>Table S5:</b> Conduct, flow and timing, and interpretation of index test and reference standard. ....                                                                                                                                                                                                                                                                                           | 8  |
| <b>Table S6:</b> QUADAS-2 risk of bias and applicability concerns summary – review authors’ judgment about each domain for 18 test evaluations reported in 17 included studies. ....                                                                                                                                                                                                               | 11 |
| <b>Table S7:</b> Calculated RT-PCR positivity rate, sensitivity, specificity, positive predictive value (PPV) and negative predictive value (NPV) with 95% confidence interval (CI) for each included study based on the 2x2 contingency tables extracted for the entire paediatric study populations irrespective of symptom status. ....                                                         | 12 |
| <b>Table S8:</b> Calculated RT-PCR positivity rate, sensitivity, specificity, positive predictive value (PPV) and negative predictive value (NPV) with 95% confidence interval (CI) for each included study based on the 2x2 contingency tables extracted for symptomatic paediatric study populations. ....                                                                                       | 13 |
| <b>Table S9:</b> Calculated RT-PCR positivity rate, sensitivity, specificity, positive predictive value (PPV) and negative predictive value (NPV) with 95% confidence interval (CI) for each included study based on the 2x2 contingency tables extracted for asymptomatic paediatric study populations. ....                                                                                      | 14 |
| <b>Table S10:</b> Calculated RT-PCR positivity rate, sensitivity, specificity, positive predictive value (PPV) and negative predictive value (NPV) with 95% confidence interval (CI) for each included study based on the 2x2 contingency tables extracted for mixed paediatric study populations. ....                                                                                            | 14 |
| <b>Table S11:</b> Calculated RT-PCR positivity rate, sensitivity, specificity, positive predictive value (PPV) and negative predictive value (NPV) with 95% confidence interval (CI) for each included study based on the 2x2 contingency tables extracted for entire paediatric study populations irrespective of symptom status when the RT-PCR cycle threshold cut-off value is set to 30. .... | 15 |
| <b>Table S12:</b> Calculated RT-PCR positivity rate, sensitivity, specificity, positive predictive value (PPV) and negative predictive value (NPV) with 95% confidence interval (CI) for each included study based on the 2x2 contingency tables extracted for entire paediatric study populations irrespective of symptom status when the RT-PCR cycle threshold cut-off value is set to 25. .... | 15 |

|                                                                                                                                                                                                                                                                                           |    |
|-------------------------------------------------------------------------------------------------------------------------------------------------------------------------------------------------------------------------------------------------------------------------------------------|----|
| <b>Figure S1:</b> Box and whisker plots of the RT-PCR positivity rates in entire paediatric study populations irrespective of symptoms and in asymptomatic, mixed, and symptomatic paediatric study populations.....                                                                      | 16 |
| <b>Figure S2:</b> Summary receiver operating characteristic (SROC) plot of sensitivity and specificity of antigen tests for diagnosis of current SARS-CoV-2 infections in (a) symptomatic, (b) asymptomatic, and (c) mixed symptomatic and asymptomatic paediatric study populations..... | 17 |
| <b>Figure S3:</b> Summary receiver operating characteristic (SROC) plot of sensitivity and specificity of antigen tests for diagnosis of current SARS-CoV-2 infections with respect to the setting.....                                                                                   | 18 |
| <b>Figure S4:</b> Summary receiver operating characteristic (SROC) plot of sensitivity and specificity of antigen tests for diagnosis of current SARS-CoV-2 infections with respect to the sample type of index test (Ag test) and reference standard (RT-PCR).....                       | 19 |
| <b>Figure S5:</b> Summary receiver operating characteristic (SROC) plot of sensitivity and specificity of antigen tests for diagnosis of current SARS-CoV-2 infections with respect to the chosen RT-PCR positivity threshold.....                                                        | 20 |
| <b>Figure S6:</b> Summary receiver operating characteristic (SROC) plot of sensitivity and specificity of antigen tests for diagnosis of current SARS-CoV-2 infections with respect to the publication status.                                                                            | 21 |
| <b>References</b> .....                                                                                                                                                                                                                                                                   | 19 |

***All tables and figures were created by the authors.***

**Table S1:** Eligibility criteria for primary studies.

|                           |                                                                                                                                                                                                                                                                                                                                                                                                                                                                                                         |
|---------------------------|---------------------------------------------------------------------------------------------------------------------------------------------------------------------------------------------------------------------------------------------------------------------------------------------------------------------------------------------------------------------------------------------------------------------------------------------------------------------------------------------------------|
| <b>(Sub-)Population</b>   | Children (i.e. pediatric study participants <18 years of age) <ul style="list-style-type: none"> <li>• with symptoms suggestive of COVID-19, or</li> <li>• without symptoms, but at an increased risk of infection (e.g. due to recent exposure to SARS-CoV-2 → contact tracing), or</li> <li>• participating in mass testing (e.g. in schools) regardless of symptoms.</li> </ul>                                                                                                                      |
| <b>Index test</b>         | Any rapid point-of-care test that is designed to detect an active SARS-CoV-2 infection and that meets the following criteria: <ul style="list-style-type: none"> <li>• performed in a non-laboratory setting at or near the point of care (including non-healthcare settings such as schools or community testing sites)</li> <li>• minimal or no training required for end user</li> <li>• sample condition: fresh</li> <li>• time to result ≤ 60 minutes</li> <li>• commercially available</li> </ul> |
| <b>Reference standard</b> | Any validated laboratory-based reverse transcription-polymerase chain reaction (RT-PCR) assay alone or in combination with clinical findings or clinical follow-up.                                                                                                                                                                                                                                                                                                                                     |
| <b>Main outcome</b>       | Diagnostic test accuracy (DTA)                                                                                                                                                                                                                                                                                                                                                                                                                                                                          |
| <b>Target condition</b>   | Current SARS-CoV-2 infection                                                                                                                                                                                                                                                                                                                                                                                                                                                                            |
| <b>Study design</b>       | Diagnostic cross-sectional or cohort studies with prospective sampling.                                                                                                                                                                                                                                                                                                                                                                                                                                 |
| <b>Unit of analysis</b>   | Individual study participants                                                                                                                                                                                                                                                                                                                                                                                                                                                                           |
| <b>Sample size</b>        | At least 10 (pediatric) <sup>a</sup> study participants each identified as positive or negative by the reference standard                                                                                                                                                                                                                                                                                                                                                                               |
| <b>Reported results</b>   | Sufficient data that allows constructing a complete 2x2 contingency table for (pediatric) <sup>a</sup> study participants per index test                                                                                                                                                                                                                                                                                                                                                                |
| <b>Publication type</b>   | Full-text journal articles (including preprints) and reports (including clinical study reports)                                                                                                                                                                                                                                                                                                                                                                                                         |
| <b>Language</b>           | English or German                                                                                                                                                                                                                                                                                                                                                                                                                                                                                       |

a: upon availability of pediatric study data

**Table S2: Data extraction items.**

|                                                      |                                                                                                                                                                                                                                                                                                                                                                                                                                                                                                                                                                                                                                        |
|------------------------------------------------------|----------------------------------------------------------------------------------------------------------------------------------------------------------------------------------------------------------------------------------------------------------------------------------------------------------------------------------------------------------------------------------------------------------------------------------------------------------------------------------------------------------------------------------------------------------------------------------------------------------------------------------------|
| <b>General study characteristics</b>                 | <ul style="list-style-type: none"> <li>• First author</li> <li>• Publication date</li> <li>• Publication status</li> <li>• Study design</li> <li>• Type of enrolment</li> <li>• Indication for testing</li> <li>• Inclusion and exclusion criteria</li> <li>• Definition of symptoms suggestive for infection with SARS-CoV-2</li> <li>• Setting</li> <li>• Location</li> <li>• Country</li> <li>• Total number of study participants</li> <li>• Number of pediatric study participants</li> <li>• Recruitment period</li> <li>• Funding sources</li> <li>• Potential conflicts of interest</li> <li>• Study registry entry</li> </ul> |
| <b>Characteristics of pediatric study population</b> | <ul style="list-style-type: none"> <li>• Age</li> <li>• Proportion of males</li> <li>• Exposure history</li> <li>• Proportion of symptomatic individuals at the time of testing (if applicable)</li> <li>• Duration of symptoms prior to testing (if applicable)</li> </ul>                                                                                                                                                                                                                                                                                                                                                            |
| <b>Index test</b>                                    | <ul style="list-style-type: none"> <li>• Name</li> <li>• Manufacturer</li> <li>• Regulatory status</li> <li>• Assay target</li> <li>• Test method</li> <li>• Readout</li> <li>• Target analyte</li> <li>• Specimen type used in study</li> <li>• Conduct of test according to manufacturer's instructions for use (as judged and reported by authors)</li> </ul>                                                                                                                                                                                                                                                                       |
| <b>Reference standard</b>                            | <ul style="list-style-type: none"> <li>• Name</li> <li>• Manufacturer</li> <li>• Viral target(s)</li> <li>• (Pre-specified) positivity threshold(s)</li> <li>• Specimen type used in study</li> </ul>                                                                                                                                                                                                                                                                                                                                                                                                                                  |
| <b>Flow and timing</b>                               | <ul style="list-style-type: none"> <li>• Specimen for index test collected by</li> <li>• Specimen for reference standard collected by</li> <li>• Time interval between specimen collection for index test and reference standard</li> <li>• Time interval between specimen collection and use of index test</li> </ul>                                                                                                                                                                                                                                                                                                                 |

---

|                                                         |                                                                                                                                                                                                                                                                                                                                                                                                                                                                                                                                                    |
|---------------------------------------------------------|----------------------------------------------------------------------------------------------------------------------------------------------------------------------------------------------------------------------------------------------------------------------------------------------------------------------------------------------------------------------------------------------------------------------------------------------------------------------------------------------------------------------------------------------------|
|                                                         | <ul style="list-style-type: none"><li>• Time interval between specimen collection and use of reference standard</li><li>• Index test performed by</li><li>• Result of index test interpreted by</li><li>• Reference standard</li><li>• Result of reference standard interpreted by</li><li>• Blinding</li><li>• Time to result index test</li><li>• Time to result reference standard</li><li>• Inconclusive or invalid result(s) of index test</li><li>• Inconclusive or invalid result(s) of reference standard</li><li>• Missing data</li></ul> |
| <b>Reported outcomes for pediatric study population</b> | <ul style="list-style-type: none"><li>• True positives (TP)</li><li>• False negatives (FN)</li><li>• True negatives (TN)</li><li>• False positives (FP)</li></ul> <p>(if available: separate outcome data depending on symptom status, symptom onset or positivity threshold of reference standard)</p>                                                                                                                                                                                                                                            |

---

**Table S3:** Study pool of the systematic review.

| Study identifier   | Data sources                                                                                                          | Registry entry   |
|--------------------|-----------------------------------------------------------------------------------------------------------------------|------------------|
| Akingba            | Preprint [1], unpublished data provided by author                                                                     | N/A              |
| Bianco             | Journal article [2], unpublished data provided by author                                                              | N/A              |
| Drevinek           | Preprint [3], unpublished data provided by author                                                                     | N/A              |
| Gonzalez-Donapetry | Journal article [4]                                                                                                   | N/A              |
| Homza              | Journal article [5], unpublished data provided by author                                                              | N/A              |
| Kiyasu             | Preprint [6], unpublished data provided by author                                                                     | N/A              |
| L'Huillier         | Preprint [7]                                                                                                          | N/A              |
| Möckel             | Journal article [8]                                                                                                   | yes <sup>a</sup> |
| Pilarowski         | Journal article [9]                                                                                                   | N/A              |
| Pollock a          | Journal article [10]                                                                                                  | N/A              |
| Pollock b          | Preprint [11]                                                                                                         | N/A              |
| Prince-Guerra      | Journal article [12]                                                                                                  | N/A              |
| Sood               | Journal article [13]                                                                                                  | N/A              |
| Shah               | Journal article [14], supplementary file provided by authors (published in [15] after finalization of the study pool) | N/A              |
| Takeuchi           | Journal article [16], unpublished data provided by author                                                             | N/A              |
| Torres             | Journal article [17], unpublished data provided by author                                                             | N/A              |
| Villaverde         | Journal article [18]                                                                                                  | N/A              |

N/A: not available

a: Study registry identifier: [DRKS00019207](https://doi.org/10.1136/drks00019207)

**Table S4:** Potentially relevant studies identified through searching clinical study registries.

| Study registry identifier   | Country      | Enrollment | Ages eligible for study           | Name of index test                               | Recruitment status <sup>a</sup> (study completion date) |
|-----------------------------|--------------|------------|-----------------------------------|--------------------------------------------------|---------------------------------------------------------|
| <a href="#">NCT04513990</a> | USA          | 1,500      | not specified (children included) | unspecified point-of-care test                   | Recruiting (estimated: Apr 2021)                        |
| <a href="#">NCT04557046</a> | USA          | 400        | any                               | LumiraDx SARS-CoV-2 Ag Test                      | Recruiting (estimated: Dec 2021)                        |
| <a href="#">NCT04583189</a> | France       | 500        | ≤18 years                         | Biosynex Covid-19 Ag BSS Rapid test              | Completed (Nov 2020)                                    |
| <a href="#">NCT04720235</a> | USA          | 304        | 14-75 years                       | Lucira COVID-19 All-In-One Test Kit              | Completed (Mar 2021)                                    |
| <a href="#">NCT04750629</a> | USA          | 100        | ≥ 1 year                          | CoviDx™ Rapid Antigen Test                       | Not yet recruiting (estimated: Mar 2021)                |
| <a href="#">NCT04808921</a> | USA          | 151        | any                               | Xiamen Wiz Biotech SARS-CoV-2 Antigen Rapid Test | Completed (Apr 2021)                                    |
| <a href="#">NCT04859023</a> | France       | 10,000     | ≥10 years                         | unspecified SARS-CoV-2 antigen test              | Completed (Feb 2021)                                    |
| <a href="#">NCT04878068</a> | not reported | 300        | ≥ 12 years                        | Therma COVID-19 Rapid Antigen Test               | Not yet recruiting (estimated: June 2021)               |

a: Status as of May 24, 2021

**Table S5:** Conduct, flow and timing, and interpretation of index test and reference standard.

| Study identifier          | Timing of specimen collection for index test and reference standard                   | Index test            |                                                   |                                                    |                                                    |                                  | Reference standard    |                                         |                       | Missing data                                                              | Invalid or inconclusive tests                                      |
|---------------------------|---------------------------------------------------------------------------------------|-----------------------|---------------------------------------------------|----------------------------------------------------|----------------------------------------------------|----------------------------------|-----------------------|-----------------------------------------|-----------------------|---------------------------------------------------------------------------|--------------------------------------------------------------------|
|                           |                                                                                       | Specimen collected by | Time to conduct of test after specimen collection | Test performed by / interpreted by                 | Blinded to reference standard                      | IFU-conform conduct <sup>a</sup> | Specimen collected by | Time to conduct of test                 | Blinded to index test |                                                                           |                                                                    |
| <b>Akingba</b>            | only one swab for both tests (swab used for Ag-test was subsequently used for RT-PCR) | n.r.                  | n.r. (result reported to participants onsite)     | n.r. / n.r.                                        | n.r., result determined prior to conduct of RT-PCR | n.r.                             | n.r.                  | n.r. (swab previously used for Ag-test) | n.r.                  | n.r., no participant flow diagram provided                                | 19/677 PCR inconclusive, pediatric subgroup: 2/41 PCR inconclusive |
| <b>Bianco</b>             | “in parallel”                                                                         | n.r.                  | n.r.                                              | trained staff / n.r.                               | n.r.                                               | yes                              | trained staff         | within a few hours                      | n.r.                  | n.r., no participant flow diagram provided                                | n.r.                                                               |
| <b>Drevinek</b>           | n.r., but same participant encounter                                                  | n.r.                  | immediately                                       | n.r. / n.r.                                        | n.r.                                               | yes                              | n.r.                  | n.r.                                    | n.r.                  | none, no participant flow diagram provided                                | 0                                                                  |
| <b>Gonzalez-Donapetry</b> | paired sample collection                                                              | n.r.                  | n.r.                                              | n.r. / n.r.                                        | n.r.                                               | yes                              | n.r.                  | n.r.                                    | n.r.                  | none, no participant flow diagram provided                                | 0                                                                  |
| <b>Homza</b>              | paired sample collection                                                              | HCW                   | immediately                                       | n.r. / n.r.                                        | n.r.                                               | yes                              | HCW                   | n.r.                                    | n.r.                  | none, no participant flow diagram provided                                | 0                                                                  |
| <b>Kiyasu</b>             | “simultaneously”                                                                      | n.r.                  | n.r.                                              | n.r. / n.r.                                        | n.r.                                               | yes                              | n.r.                  | n.r.                                    | n.r.                  | 5/1939 <sup>b</sup> no symptom data, no participant flow diagram provided | 0                                                                  |
| <b>L’Huillier</b>         | n.r., but same participant encounter                                                  | HCW                   | immediately                                       | n.r. / two members of the study team independently | n.r., result determined prior to RT-PCR            | yes                              | HCW                   | n.r.                                    | n.r.                  | 58/883 refused Ag-test, 2/825 Ag-test result not reported                 | 1/825 Ag-test result invalid                                       |



| Study identifier     | Timing of specimen collection for index test and reference standard | Index test                    |                                                                          |                                                                                         |                                         |                                                           | Reference standard            |                                                     |                       | Missing data                                                            | Invalid or inconclusive tests                    |
|----------------------|---------------------------------------------------------------------|-------------------------------|--------------------------------------------------------------------------|-----------------------------------------------------------------------------------------|-----------------------------------------|-----------------------------------------------------------|-------------------------------|-----------------------------------------------------|-----------------------|-------------------------------------------------------------------------|--------------------------------------------------|
|                      |                                                                     | Specimen collected by         | Time to conduct of test after specimen collection                        | Test performed by / interpreted by                                                      | Blinded to reference standard           | IFU-conform conduct <sup>a</sup>                          | Specimen collected by         | Time to conduct of test                             | Blinded to index test |                                                                         |                                                  |
|                      |                                                                     |                               |                                                                          | (consensus required)                                                                    |                                         |                                                           |                               |                                                     |                       |                                                                         |                                                  |
| <b>Möckel</b>        | n.r., but same participant encounter                                | HCW                           | immediately                                                              | HCW / two HCW (consensus required)                                                      | n.r., result determined prior to RT-PCR | yes                                                       | HCW                           | n.r. (time to result (h): median: 8.2 range:3.8-39) | yes                   | none                                                                    | 0                                                |
| <b>Pilarowski</b>    | paired sample collection                                            | certified lab assistants      | n.r. (1 hour from onsite registration to return of positive test result) | n.r. / certified technician readers                                                     | n.r., result determined prior to RT-PCR | n.r. (only specimen collection according to IFU reported) | certified lab assistants      | n.r.                                                | n.r.                  | none, no participant flow diagram provided                              | 0                                                |
| <b>Pollock a</b>     | paired sample collection                                            | trained staff                 | within 1 hour                                                            | laboratorian / two laboratorians independently (1 <sup>st</sup> read = official result) | n.r., result determined prior to RT-PCR | yes                                                       | trained staff                 | n.r.                                                | n.r.                  | 94/2482 samples tested at <53°F, 54/2482 missing data                   | 26/2482 inconclusive RT-PCR                      |
| <b>Pollock b</b>     | paired sample collection                                            | trained staff                 | 99.7% within 1 hour                                                      | laboratorian / two laboratorians independently (1 <sup>st</sup> read = official result) | n.r., result determined prior to RT-PCR | yes                                                       | trained staff                 | n.r.                                                | n.r.                  | 48/1603 invalid or missing RT-PCR result, 57/1603 missing clinical data | invalid missing RT-PCR results, see missing data |
| <b>Prince-Guerra</b> | paired sample collection                                            | HCW                           | immediately                                                              | n.r. / n.r.                                                                             | n.r.                                    | yes                                                       | HCW                           | within 24-48 hours                                  | n.r.                  | n.r., no participant flow diagram provided                              | n.r.                                             |
| <b>Shah</b>          | same participant encounter                                          | participants (self-collected, | n.r. (participants provided documentation of                             | trained staff / n.r.                                                                    | n.r., result determined                 | yes                                                       | participants (self-collected, | n.r. (specimen with inconclu-                       | n.r.                  | 7/2127 missing RT-PCR result, no participant flow diagram provided      | 4/2127 indeterminate Ag test result,             |

| Study identifier  | Timing of specimen collection for index test and reference standard | Index test            |                                                                           |                                                |                               |                                  | Reference standard                        |                                                                                |                       | Missing data                                                                                                   | Invalid or inconclusive tests                                |
|-------------------|---------------------------------------------------------------------|-----------------------|---------------------------------------------------------------------------|------------------------------------------------|-------------------------------|----------------------------------|-------------------------------------------|--------------------------------------------------------------------------------|-----------------------|----------------------------------------------------------------------------------------------------------------|--------------------------------------------------------------|
|                   |                                                                     | Specimen collected by | Time to conduct of test after specimen collection                         | Test performed by / interpreted by             | Blinded to reference standard | IFU-conform conduct <sup>a</sup> | Specimen collected by                     | Time to conduct of test                                                        | Blinded to index test |                                                                                                                |                                                              |
|                   |                                                                     | super-vised)          | the initial test result about 30 minutes after initial sample collection) |                                                | prior to RT-PCR               |                                  | super-vised)                              | sive results were retested)                                                    |                       | 6/2127 inconclusive RT-PCR result                                                                              |                                                              |
| <b>Sood</b>       | n.r., but same participant encounter                                | trained staff         | n.r.                                                                      | n.r. / two study staff (no consensus required) | n.r.                          | yes                              | participants (self-collected, supervised) | n.r.                                                                           | n.r.                  | 4/783 (pediatric subgroup) reason not reported, no participant flow diagram provided                           | 5/779 (pediatric subgroup) inconclusive result of index test |
| <b>Takeuchi</b>   | "simultaneously"                                                    | n.r.                  | immediately                                                               | n.r. / examiner                                | n.r.                          | yes                              | n.r.                                      | in-house RT-PCR: same day as sample collection, reference RT-PCR: up to 1 week | n.r.                  | 22/1208 not the first participant encounter, 4/1208 missing symptom data, no participant flow diagram provided | 0                                                            |
| <b>Torres</b>     | paired sample collection                                            | HCW                   | immediately                                                               | n.r. / n.r.                                    | n.r.                          | n.r.                             | HCW                                       | within 24 hours of specimen collection                                         | n.r.                  | none, no participant flow diagram provided                                                                     | 0                                                            |
| <b>Villaverde</b> | "concurrently"                                                      | HCW                   | n.r.                                                                      | n.r. / HCW                                     | n.r.                          | yes                              | HCW                                       | within 24 hours of specimen collection                                         | n.r.                  | none, no participant flow diagram provided                                                                     | 0                                                            |

**Abbreviations**

HCW: health care worker; IFU: instructions for use; n.r.: not reported; RT-PCR: reverse transcription-polymerase chain reaction

**Footnotes**

a: as judged and reported by the authors; b: unit of analysis = samples, but unit of analysis for paediatric subgroup = individual study participants

**Table S6:** QUADAS-2 risk of bias and applicability concerns summary – review authors' judgment about each domain for 18 test evaluations reported in 17 included studies.

| Study identifier      | Risk of bias      |            |                    |                 | Applicability concerns |            |                    |
|-----------------------|-------------------|------------|--------------------|-----------------|------------------------|------------|--------------------|
|                       | Patient selection | Index test | Reference standard | Flow and timing | Patient selection      | Index test | Reference standard |
| <b>Akingba</b>        | unclear           | unclear    | unclear            | low             | low                    | unclear    | low                |
| <b>Bianco</b>         | unclear           | unclear    | unclear            | unclear         | low                    | unclear    | low                |
| <b>Drevinek (IT1)</b> | unclear           | unclear    | unclear            | low             | low                    | unclear    | low                |
| <b>Drevinek (IT2)</b> | unclear           | low        | unclear            | low             | low                    | unclear    | low                |
| <b>Gonzalez-D.</b>    | unclear           | unclear    | unclear            | low             | high                   | unclear    | low                |
| <b>Homza</b>          | low               | unclear    | unclear            | low             | low                    | unclear    | low                |
| <b>Kiyasu</b>         | unclear           | unclear    | unclear            | low             | low                    | unclear    | low                |
| <b>L'Huillier</b>     | low               | low        | unclear            | high            | low                    | low        | low                |
| <b>Möckel</b>         | low               | low        | low                | low             | low                    | unclear    | low                |
| <b>Pilarowski</b>     | unclear           | unclear    | unclear            | low             | low                    | unclear    | low                |
| <b>Pollock a</b>      | unclear           | unclear    | unclear            | high            | low                    | unclear    | low                |
| <b>Pollock b</b>      | unclear           | unclear    | unclear            | high            | low                    | low        | low                |
| <b>Prince-G.</b>      | unclear           | unclear    | unclear            | unclear         | low                    | low        | low                |
| <b>Shah</b>           | unclear           | unclear    | unclear            | low             | low                    | unclear    | low                |
| <b>Sood</b>           | unclear           | high       | unclear            | unclear         | low                    | high       | low                |
| <b>Takeuchi</b>       | unclear           | unclear    | unclear            | low             | low                    | unclear    | low                |
| <b>Torres</b>         | low               | unclear    | unclear            | low             | low                    | unclear    | low                |
| <b>Villaverde</b>     | high              | unclear    | unclear            | low             | high                   | unclear    | low                |

IT1: Index test 1; IT 2: Index test 2

**Table S7:** Calculated RT-PCR positivity rate, sensitivity, specificity, positive predictive value (PPV) and negative predictive value (NPV) with 95% confidence interval (CI) for each included study based on the 2x2 contingency tables extracted for the entire paediatric study populations irrespective of symptom status.

| Study identifier          | TP  | FP | TN   | FN | RT-PCR<br>positivity rate | Sensitivity<br>(95% CI) | Specificity<br>(95% CI) | PPV<br>(95% CI)  | NPV<br>(95% CI)  |
|---------------------------|-----|----|------|----|---------------------------|-------------------------|-------------------------|------------------|------------------|
| <b>Akingba</b>            | 9   | 0  | 28   | 2  | 28.2                      | 81.8 (52.3-94.9)        | 100 (87.9-100)          | 95.0 (65.6-99.5) | 91.9 (77.2-97.5) |
| <b>Bianco</b>             | 12  | 8  | 141  | 4  | 9.7                       | 75.0 (50.5-89.8)        | 94.6 (89.8-97.3)        | 60.0 (38.7-78.1) | 97.2 (93.1-98.9) |
| <b>Drevinek (IT1)</b>     | 8   | 0  | 19   | 4  | 38.7                      | 66.7 (39.1-86.2)        | 100 (83.2-100)          | 94.4 (62.9-99.4) | 81.2 (61.8-92.1) |
| <b>Drevinek (IT2)</b>     | 8   | 0  | 19   | 4  | 38.7                      | 66.7 (39.1-86.2)        | 100 (83.2-100)          | 94.4 (62.9-99.4) | 81.2 (61.8-92.1) |
| <b>Gonzales-Donapetry</b> | 14  | 0  | 422  | 4  | 4.1                       | 77.8 (54.8-91.0)        | 100 (99.1-100)          | 96.7 (74.7-99.7) | 98.9 (97.4-99.6) |
| <b>Homza</b>              | 8   | 1  | 11   | 4  | 50.0                      | 66.7 (39.1-86.2)        | 91.7 (64.6-98.5)        | 88.9 (56.5-98.0) | 73.3 (48.0-89.1) |
| <b>Kiyasu</b>             | 7   | 0  | 80   | 3  | 11.1                      | 70.0 (39.7-89.2)        | 100 (95.4-100)          | 93.8 (59.8-99.3) | 95.8 (89.2-98.5) |
| <b>L'Huillier</b>         | 78  | 1  | 702  | 41 | 14.5                      | 65.5 (56.6-73.5)        | 99.9 (99.2-100)         | 98.7 (93.2-99.8) | 94.5 (92.6-95.9) |
| <b>Möckel</b>             | 18  | 1  | 176  | 7  | 12.4                      | 72.0 (52.4-85.7)        | 99.4 (96.9-99.9)        | 94.7 (75.4-99.1) | 96.2 (92.3-98.1) |
| <b>Pilarowski</b>         | 30  | 0  | 174  | 5  | 16.7                      | 85.7 (70.6-93.7)        | 100 (97.8-100)          | 98.4 (86.3-99.8) | 96.9 (93.3-98.6) |
| <b>Pollock a</b>          | 94  | 7  | 786  | 41 | 14.5                      | 69.6 (61.4-76.8)        | 99.1 (98.2-99.6)        | 93.1 (86.4-96.6) | 95.0 (93.3-96.3) |
| <b>Pollock b</b>          | 26  | 7  | 200  | 20 | 18.2                      | 56.5 (42.2-69.8)        | 96.6 (93.2-98.4)        | 78.8 (62.3-89.3) | 90.9 (86.4-94.0) |
| <b>Prince-Guerra</b>      | 9   | 1  | 213  | 13 | 9.3                       | 40.9 (23.3-61.3)        | 99.5 (97.4-99.9)        | 90.0 (59.6-98.2) | 94.2 (90.4-96.6) |
| <b>Shah</b>               | 25  | 0  | 182  | 10 | 16.1                      | 71.4 (54.9-83.7)        | 100 (97.9-100)          | 98.1 (84.0-99.8) | 94.6 (90.4-97.0) |
| <b>Sood</b>               | 127 | 9  | 539  | 99 | 29.2                      | 56.2 (49.7-62.5)        | 98.4 (96.9-99.1)        | 93.4 (87.9-96.5) | 84.5 (81.5-87.1) |
| <b>Takeuchi</b>           | 9   | 0  | 153  | 2  | 6.7                       | 81.8 (52.3-94.9)        | 100 (97.6-100)          | 95.0 (65.6-99.5) | 98.4 (95.0-99.5) |
| <b>Torres</b>             | 5   | 0  | 58   | 10 | 20.5                      | 33.3 (15.2-58.3)        | 100 (93.8-100)          | 91.7 (51.7-99.1) | 84.8 (74.5-91.4) |
| <b>Villaverde</b>         | 35  | 3  | 1540 | 42 | 4.8                       | 45.5 (34.8-56.5)        | 99.8 (99.4-99.9)        | 92.1 (79.2-97.3) | 97.3 (96.4-98.0) |

TP: true positive, FP: false positive, TN: true negative, FN: false negative

RT-PCR: reverse transcription-polymerase chain reaction

IT1: Index test 1; IT2: Index test 2

**Table S8:** Calculated RT-PCR positivity rate, sensitivity, specificity, positive predictive value (PPV) and negative predictive value (NPV) with 95% confidence interval (CI) for each included study based on the 2x2 contingency tables extracted for symptomatic paediatric study populations.

| Study identifier          | TP | FP | TN   | FN | RT-PCR<br>positivity rate | Sensitivity<br>(95% CI) | Specificity<br>(95% CI) | PPV<br>(95% CI)  | NPV<br>(95% CI)  |
|---------------------------|----|----|------|----|---------------------------|-------------------------|-------------------------|------------------|------------------|
| <b>Akingba</b>            | 9  | 0  | 28   | 2  | 28.2                      | 81.8 (52.3-94.9)        | 100 (87.9-100)          | 95.0 (65.6-99.5) | 91.9 (77.2-97.5) |
| <b>Bianco</b>             | 5  | 0  | 9    | 2  | 43.8                      | 71.4 (35.9-91.8)        | 100 (70.1-100)          | 91.7 (51.7-99.1) | 79.2 (50.9-93.3) |
| <b>Drevinek (IT1)</b>     | 6  | 0  | 3    | 1  | 70.0                      | 85.7 (48.7-97.4)        | 100 (43.9-100)          | 92.9 (56.1-99.2) | 70.0 (29.9-92.7) |
| <b>Drevinek (IT2)</b>     | 6  | 0  | 3    | 1  | 70.0                      | 85.7 (48.7-97.4)        | 100 (43.9-100)          | 92.9 (56.1-99.2) | 70.0 (29.9-92.7) |
| <b>Gonzales-Donapetry</b> | 14 | 0  | 422  | 4  | 4.1                       | 77.8 (54.8-91.0)        | 100 (99.1-100)          | 96.7 (74.7-99.7) | 98.9 (97.4-99.6) |
| <b>L'Huillier</b>         | 65 | 1  | 443  | 24 | 16.7                      | 73.0 (63.0-81.2)        | 99.8 (98.7-100)         | 98.5 (91.9-99.7) | 94.9 (92.5-96.5) |
| <b>Möckel</b>             | 18 | 1  | 176  | 7  | 12.4                      | 72.0 (52.4-85.7)        | 99.4 (96.9-99.9)        | 94.7 (75.4-99.1) | 96.2 (92.3-98.1) |
| <b>Pilarowski</b>         | 12 | 0  | 23   | 1  | 36.1                      | 92.3 (66.7-98.6)        | 100 (85.7-100)          | 96.2 (71.7-99.6) | 94.0 (77.7-98.6) |
| <b>Pollock a</b>          | 22 | 0  | 65   | 4  | 28.6                      | 84.6 (66.5-93.8)        | 100 (94.4-100)          | 97.8 (82.2-99.8) | 93.6 (85.3-97.3) |
| <b>Pollock b</b>          | 7  | 3  | 20   | 2  | 28.1                      | 77.8 (45.3-93.7)        | 87 (67.9-95.5)          | 70.0 (39.7-89.2) | 90.9 (72.2-97.5) |
| <b>Shah</b>               | 20 | 0  | 89   | 7  | 23.3                      | 74.1 (55.3-86.8)        | 100 (95.9-100)          | 97.6 (80.8-99.8) | 92.3 (85.2-96.1) |
| <b>Sood</b>               | 56 | 4  | 91   | 31 | 47.8                      | 64.4 (53.9-73.6)        | 95.8 (89.7-98.4)        | 93.3 (84.1-97.4) | 74.6 (66.2-81.5) |
| <b>Takeuchi</b>           | 1  | 0  | 89   | 0  | 1.1                       | 100 (20.7-100)          | 100 (95.9-100)          | 75.0 (19.8-97.3) | 99.4 (94.9-99.9) |
| <b>Villaverde</b>         | 35 | 3  | 1540 | 42 | 4.8                       | 45.5 (34.8-56.5)        | 99.8 (99.4-99.9)        | 92.1 (79.2-97.3) | 97.3 (96.4-98.0) |

TP: true positive, FP: false positive, TN: true negative, FN: false negative

RT-PCR: reverse transcription-polymerase chain reaction

IT1: Index test 1; IT 2: Index test 2

**Table S9:** Calculated RT-PCR positivity rate, sensitivity, specificity, positive predictive value (PPV) and negative predictive value (NPV) with 95% confidence interval (CI) for each included study based on the 2x2 contingency tables extracted for asymptomatic paediatric study populations.

| Study identifier | TP | FP | TN  | FN | RT-PCR positivity rate | Sensitivity (95% CI) | Specificity (95% CI) | PPV (95% CI)     | NPV (95% CI)     |
|------------------|----|----|-----|----|------------------------|----------------------|----------------------|------------------|------------------|
| Bianco           | 7  | 8  | 132 | 2  | 6.0                    | 77.8 (45.3-93.7)     | 94.3 (89.1-97.1)     | 46.7 (24.8-69.9) | 98.5 (94.7-99.6) |
| Drevinek (IT1)   | 2  | 0  | 16  | 3  | 23.8                   | 40.0 (11.8-76.9)     | 100 (80.6-100)       | 83.3 (31.0-98.2) | 82.5 (61.1-93.4) |
| Drevinek (IT2)   | 2  | 0  | 16  | 3  | 23.8                   | 40.0 (11.8-76.9)     | 100 (80.6-100)       | 83.3 (31.0-98.2) | 82.5 (61.1-93.4) |
| Kiyasu           | 7  | 0  | 76  | 3  | 11.6                   | 70.0 (39.7-89.2)     | 100 (95.2-100)       | 93.8 (59.8-99.3) | 95.6 (88.7-98.4) |
| L'Huillier       | 13 | 0  | 259 | 17 | 10.4                   | 43.3 (27.4-60.8)     | 100 (98.5-100)       | 96.4 (73.2-99.6) | 93.7 (90.2-96.0) |
| Pollock a        | 70 | 7  | 715 | 37 | 12.9                   | 65.4 (56.0-73.8)     | 99.0 (98.0-99.5)     | 90.9 (82.4-95.5) | 95.1 (93.3-96.4) |
| Pollock b        | 19 | 4  | 180 | 18 | 16.7                   | 51.4 (35.9-66.6)     | 97.8 (94.5-99.2)     | 82.6 (62.9-93.0) | 90.9 (86.1-94.2) |
| Shah             | 4  | 0  | 90  | 3  | 7.2                    | 57.1 (25.0-84.2)     | 100 (95.9-100)       | 90.0 (46.3-99.0) | 96.3 (90.3-98.6) |
| Sood             | 71 | 5  | 448 | 68 | 23.5                   | 51.1 (42.9-59.2)     | 98.9 (97.4-99.5)     | 93.4 (85.5-97.2) | 86.8 (83.6-89.5) |
| Takeuchi         | 8  | 0  | 64  | 2  | 13.5                   | 80.0 (49.0-94.3)     | 100 (94.3-100)       | 94.4 (62.9-99.4) | 96.3 (88.7-98.8) |
| Torres           | 5  | 0  | 58  | 10 | 20.5                   | 33.3 (15.2-58.3)     | 100 (93.8-100)       | 91.7 (51.7-99.1) | 84.8 (74.5-91.4) |

TP: true positive, FP: false positive, TN: true negative, FN: false negative

RT-PCR: reverse transcription-polymerase chain reaction

IT1: Index test 1; IT 2: Index test 2

**Table S10:** Calculated RT-PCR positivity rate, sensitivity, specificity, positive predictive value (PPV) and negative predictive value (NPV) with 95% confidence interval (CI) for each included study based on the 2x2 contingency tables extracted for mixed paediatric study populations.

| Study identifier | TP | FP | TN  | FN | RT-PCR positivity rate | Sensitivity (95% CI) | Specificity (95% CI) | PPV (95% CI)     | NPV (95% CI)     |
|------------------|----|----|-----|----|------------------------|----------------------|----------------------|------------------|------------------|
| Homza            | 8  | 1  | 11  | 4  | 50.0                   | 66.7 (39.1-86.2)     | 91.7 (64.6-98.5)     | 88.9 (56.5-98.0) | 73.3 (48.0-89.1) |
| Pilarowski       | 18 | 0  | 137 | 4  | 13.8                   | 81.8 (61.5-92.7)     | 100 (97.3-100)       | 97.4 (79.1-99.7) | 96.8 (92.5-98.7) |
| Prince-Guerra    | 9  | 1  | 213 | 13 | 9.3                    | 40.9 (23.3-61.3)     | 99.5 (97.4-99.9)     | 90.0 (59.6-98.2) | 94.2 (90.4-96.6) |

TP: true positive, FP: false positive, TN: true negative, FN: false negative

RT-PCR: reverse transcription-polymerase chain reaction

**Table S11:** Calculated RT-PCR positivity rate, sensitivity, specificity, positive predictive value (PPV) and negative predictive value (NPV) with 95% confidence interval (CI) for each included study based on the 2x2 contingency tables extracted for entire paediatric study populations irrespective of symptom status when the RT-PCR cycle threshold cut-off value is set to 30.

| Study identifier | TP | FP | TN  | FN | RT-PCR positivity rate | Sensitivity (95% CI) | Specificity (95% CI) | PPV (95% CI)     | NPV (95% CI)     |
|------------------|----|----|-----|----|------------------------|----------------------|----------------------|------------------|------------------|
| Akingba          | 9  | 0  | 30  | 0  | 23.1                   | 100 (70.1-100)       | 100 (88.6-100)       | 95.0 (65.6-99.5) | 98.4 (86.3-99.8) |
| Pilarowski       | 24 | 6  | 179 | 0  | 11.5                   | 100 (86.2-100)       | 96.8 (93.1-98.5)     | 79.0 (61.9-89.7) | 99.7 (97.4-100)  |
| Pollock a        | 84 | 17 | 818 | 9  | 10.0                   | 90.3 (82.6-94.8)     | 98.0 (96.8-98.7)     | 83.2 (74.7-89.2) | 98.9 (97.9-99.4) |
| Pollock b        | 24 | 9  | 215 | 5  | 11.5                   | 82.8 (65.5-92.4)     | 96.0 (92.5-97.9)     | 72.7 (55.8-84.9) | 97.7 (94.8-99.0) |
| Sood             | 42 | 91 | 625 | 11 | 6.9                    | 79.2 (66.5-88.0)     | 87.3 (84.7-89.5)     | 31.6 (24.3-39.9) | 98.3 (96.9-99.0) |
| Torres           | 5  | 0  | 60  | 8  | 17.8                   | 38.5 (17.7-64.5)     | 100 (94.0-100)       | 91.7 (51.7-99.1) | 87.7 (77.9-93.5) |

TP: true positive, FP: false positive, TN: true negative, FN: false negative  
RT-PCR: reverse transcription-polymerase chain reaction

**Table S12:** Calculated RT-PCR positivity rate, sensitivity, specificity, positive predictive value (PPV) and negative predictive value (NPV) with 95% confidence interval (CI) for each included study based on the 2x2 contingency tables extracted for entire paediatric study populations irrespective of symptom status when the RT-PCR cycle threshold cut-off value is set to 25.

| Study identifier | TP | FP  | TN  | FN | RT-PCR positivity rate | Sensitivity (95% CI) | Specificity (95% CI) | PPV (95% CI)     | NPV (95% CI)     |
|------------------|----|-----|-----|----|------------------------|----------------------|----------------------|------------------|------------------|
| Akingba          | 4  | 5   | 30  | 0  | 10.3                   | 100 (51.0-100)       | 85.7 (70.6-93.7)     | 45.0 (20.1-72.6) | 98.4 (86.3-99.8) |
| Pollock a        | 61 | 40  | 826 | 1  | 6.7                    | 98.4 (91.4-99.7)     | 95.4 (93.8-96.6)     | 60.4 (50.6-69.4) | 99.9 (99.3-100)  |
| Pollock b        | 20 | 13  | 220 | 0  | 7.9                    | 100 (83.9-100)       | 94.4 (90.7-96.7)     | 60.3 (43.6-74.9) | 99.8 (97.9-100)  |
| Sood             | 15 | 118 | 635 | 1  | 2.1                    | 93.8 (71.7-98.9)     | 84.3 (81.6-86.8)     | 11.3 (7.0-17.8)  | 99.8 (99.1-100)  |
| Torres           | 4  | 1   | 65  | 3  | 9.6                    | 57.1 (25.0-84.2)     | 98.5 (91.9-99.7)     | 80.0 (37.5-96.4) | 95.6 (87.8-98.5) |

TP: true positive, FP: false positive, TN: true negative, FN: false negative  
RT-PCR: reverse transcription-polymerase chain reaction

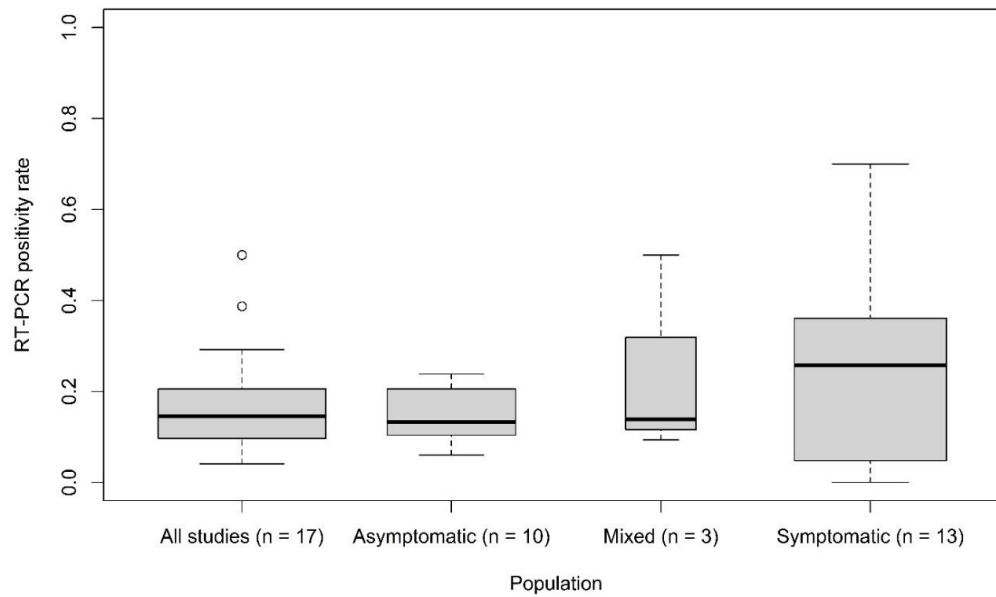

**Figure S1:** Box and whisker plots of the RT-PCR positivity rates in entire paediatric study populations irrespective of symptoms and in asymptomatic, mixed, and symptomatic paediatric study populations. The box is drawn from the first to the third quartile, defined via hinges. The bold horizontal line in the box denotes the median. The whiskers extend out of the box by 1.5 times the difference between the hinges. Outliers are plotted as small circle. The width of the box corresponds to the number of considered studies.



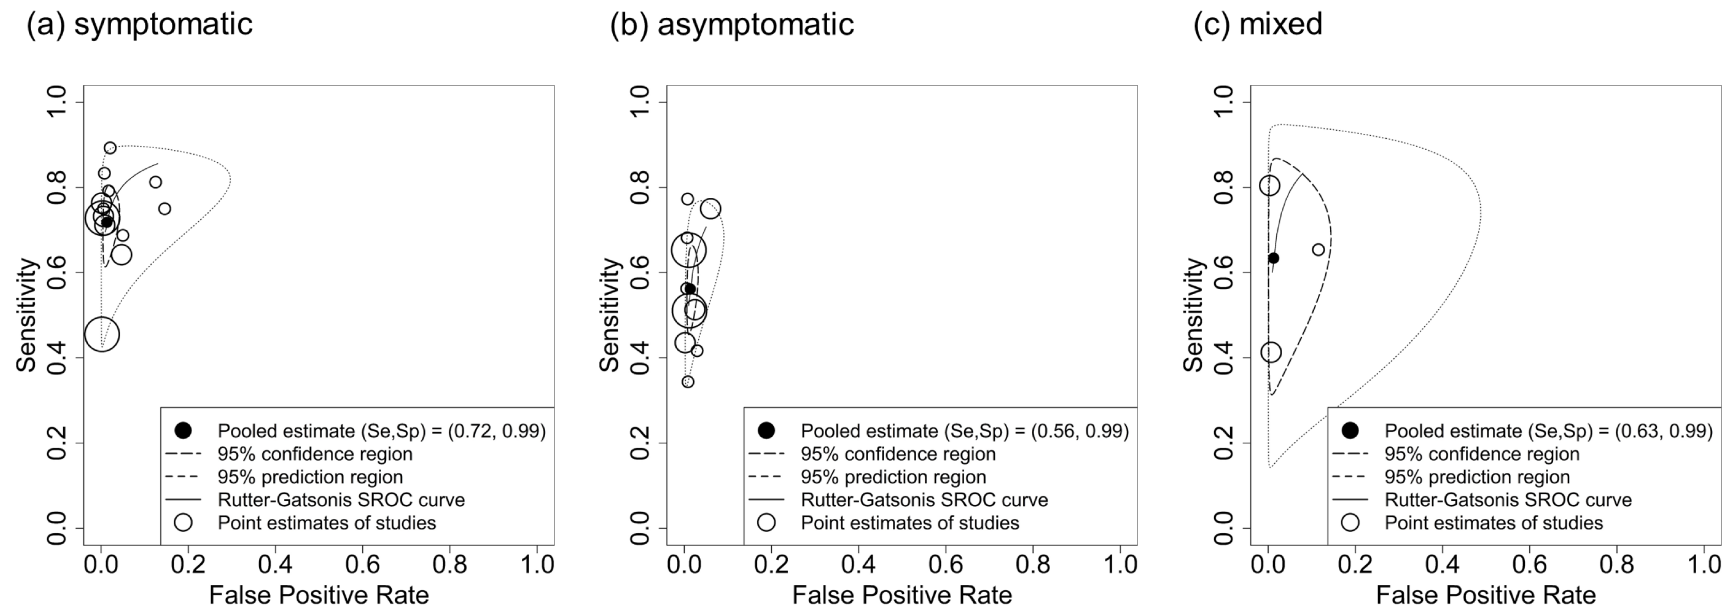

**Figure S2:** Summary receiver operating characteristic (SROC) plot of sensitivity and specificity of antigen tests for diagnosis of current SARS-CoV-2 infections in (a) symptomatic, (b) asymptomatic, and (c) mixed symptomatic and asymptomatic paediatric study populations. Each circle represents the point estimate of an individual study, whereas the size of the circle correlates with the number of paediatric study participants (small circle: <100 participants, medium circle: between 100 and 500 participants, large circle: >500 participants). The pooled estimate (black dot) of the pair of sensitivity (Se) and specificity (Sp) is surrounded by its 95% confidence region (closed curve with short dashes) and prediction region (closed curve with long dashes). The estimation of the SROC curve is based on the bivariate approach by Rutter and Gatsonis [19].

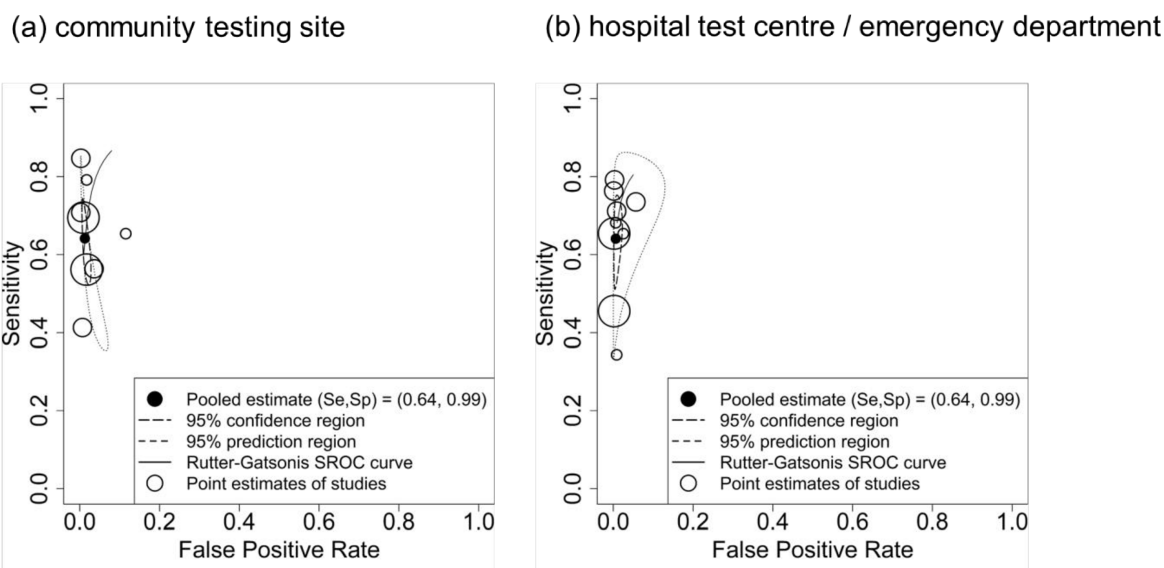

**Figure S3:** Summary receiver operating characteristic (SROC) plot of sensitivity and specificity of antigen tests for diagnosis of current SARS-CoV-2 infections with respect to the setting. (a) community testing site, (b) hospital test centre / emergency department. Each circle represents the point estimate of an individual study, whereas the size of the circle correlates with the number of paediatric study participants (small circle: <100 participants, medium circle: between 100 and 500 participants, large circle: >500 participants). The pooled estimate (black dot) of the pair of sensitivity (Se) and specificity (Sp) is surrounded by its 95% confidence region (closed curve with short dashes) and prediction region (closed curve with long dashes). The estimation of the SROC curve is based on the bivariate approach by Rutter and Gatsonis [19].

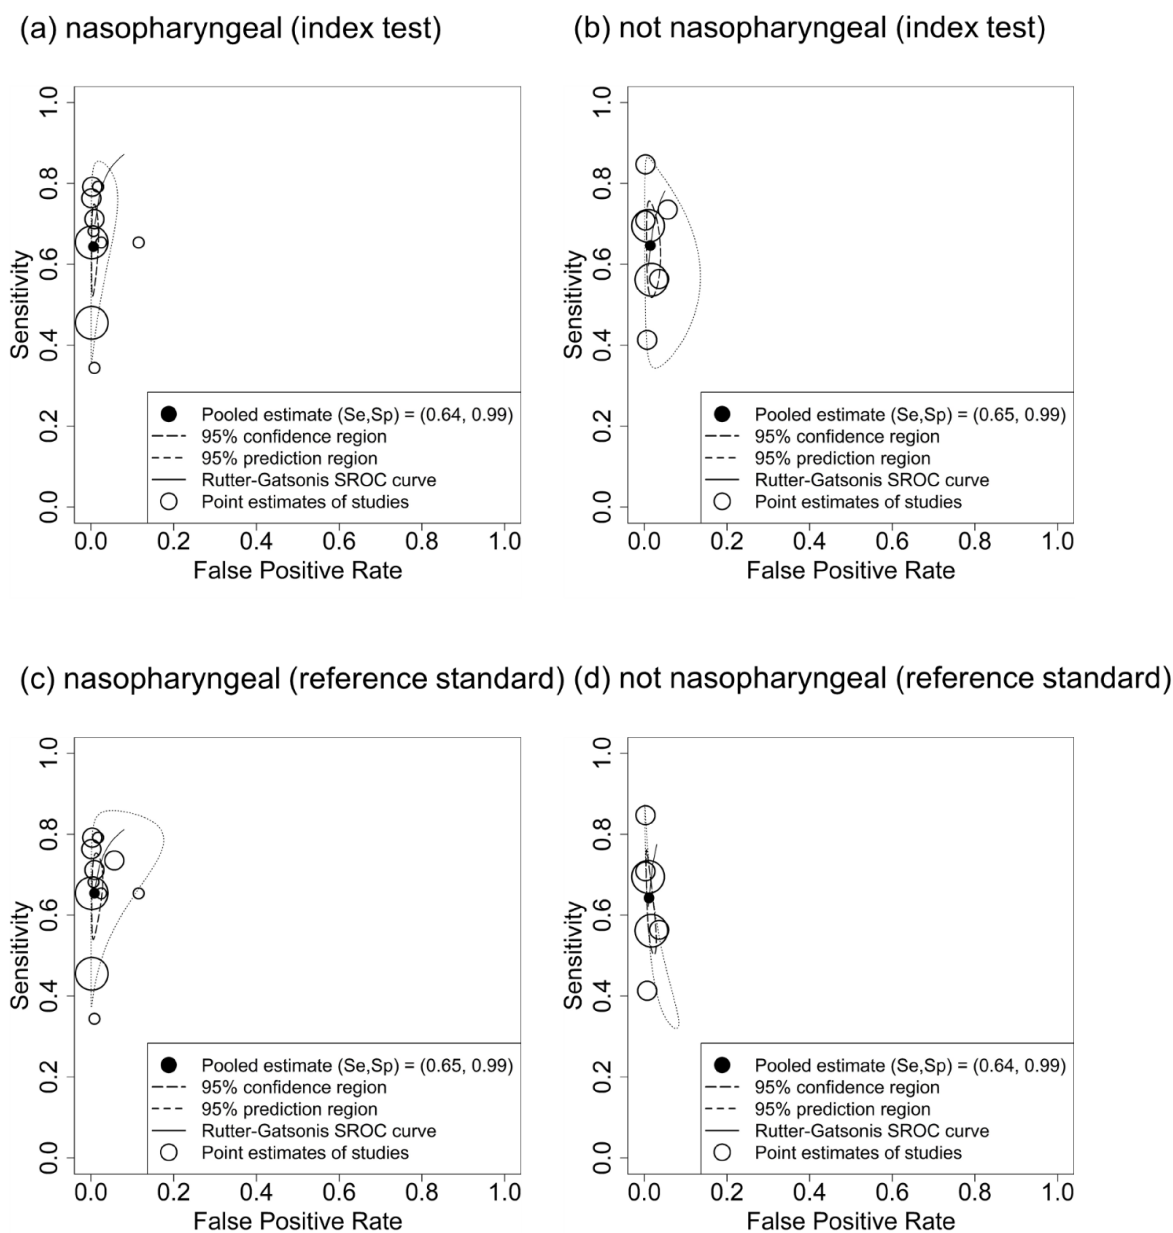

**Figure S4:** Summary receiver operating characteristic (SROC) plot of sensitivity and specificity of antigen tests for diagnosis of current SARS-CoV-2 infections with respect to the sample type of index test (Ag test) and reference standard (RT-PCR). (a) nasopharyngeal (index test), (b) not nasopharyngeal (index test), (c) nasopharyngeal (reference standard), (d) not nasopharyngeal (reference standard). Each circle represents the point estimate of an individual study, whereas the size of the circle correlates with the number of paediatric study participants (small circle: <100 participants, medium circle: between 100 and 500 participants, large circle: >500 participants). The pooled estimate (black dot) of the pair of sensitivity (Se) and specificity (Sp) is surrounded by its 95% confidence region (closed curve with short dashes) and prediction region (closed curve with long dashes). The estimation of the SROC curve is based on the bivariate approach by Rutter and Gatsonis [19].

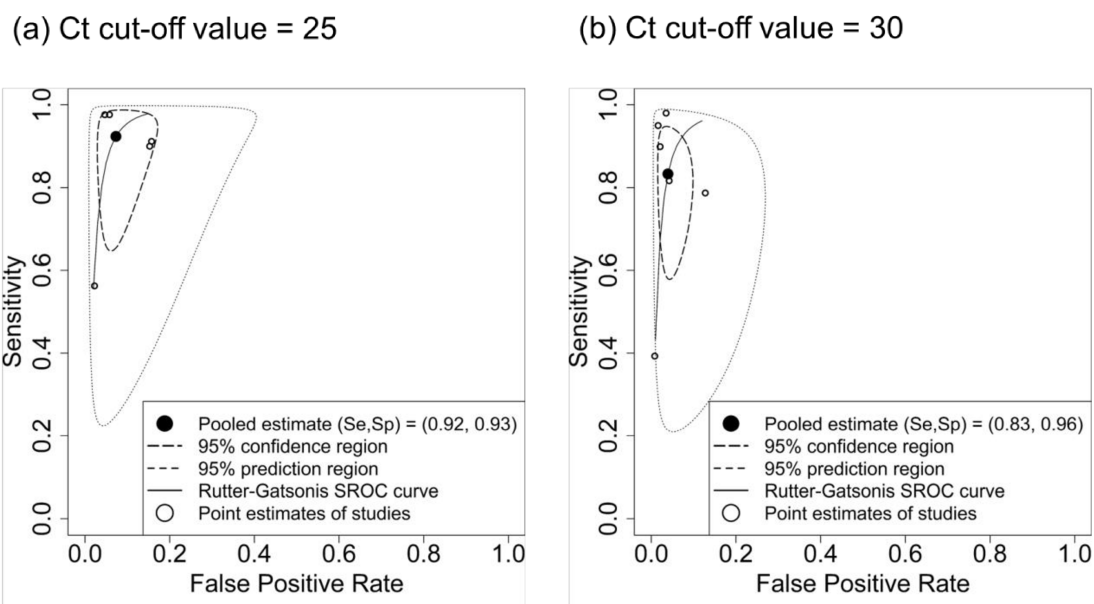

**Figure S5:** Summary receiver operating characteristic (SROC) plot of sensitivity and specificity of antigen tests for diagnosis of current SARS-CoV-2 infections with respect to the chosen RT-PCR positivity threshold. (a) Ct cut-off value = 25, (b) Ct cut-off value = 30. Each circle represents the point estimate of an individual study, whereas the size of the circle correlates with the number of paediatric study participants (small circle: <100 participants, medium circle: between 100 and 500 participants, large circle: >500 participants). The pooled estimate (black dot) of the pair of sensitivity (Se) and specificity (Sp) is surrounded by its 95% confidence region (closed curve with short dashes) and prediction region (closed curve with long dashes). The estimation of the SROC curve is based on the bivariate approach by Rutter and Gatsonis [19].

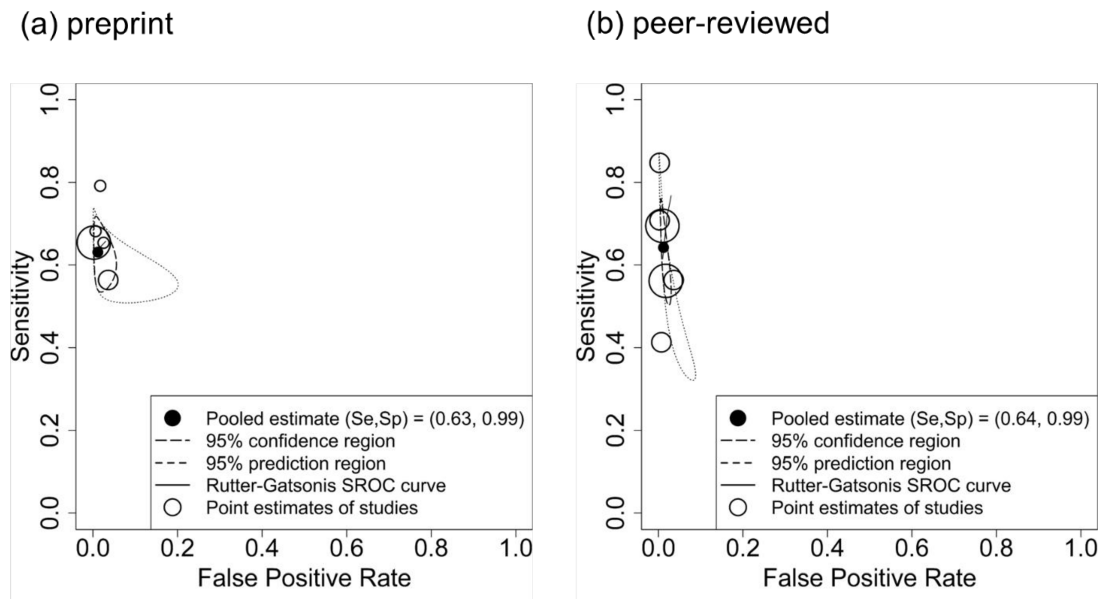

**Figure S6:** Summary receiver operating characteristic (SROC) plot of sensitivity and specificity of antigen tests for diagnosis of current SARS-CoV-2 infections with respect to the publication status. (a) preprint, (b) peer-reviewed. Each circle represents the point estimate of an individual study, whereas the size of the circle correlates with the number of paediatric study participants (small circle: <100 participants, medium circle: between 100 and 500 participants, large circle: >500 participants). The pooled estimate (black dot) of the pair of sensitivity (Se) and specificity (Sp) is surrounded by its 95% confidence region (closed curve with short dashes) and prediction region (closed curve with long dashes). The estimation of the SROC curve is based on the bivariate approach by Rutter and Gatsonis [19].

## References

- 1 Akingba OL, Sprong K, Hardie DR. Field performance evaluation of the PanBio rapid SARS-CoV-2 antigen assay in an epidemic driven by 501Y.v2 (lineage B.1.351) in the Eastern Cape, South Africa. *medRxiv* 2021;:2021.02.03.21251057. doi:10.1101/2021.02.03.21251057
- 2 Bianco G, Boattini M, Barbui AM, *et al.* Evaluation of an antigen-based test for hospital point-of-care diagnosis of SARS-CoV-2 infection. *J Clin Virol* 2021;**139**:104838. doi:10.1016/j.jcv.2021.104838
- 3 Drevinek P, Hurych J, Kepka Z, *et al.* The sensitivity of SARS-CoV-2 antigen tests in the view of large-scale testing. *medRxiv* 2020;:2020.11.23.20237198. doi:10.1101/2020.11.23.20237198
- 4 Gonzalez-Donapetry P, Garcia-Clemente P, Bloise I, *et al.* Think of the Children: Evaluation of SARS-CoV-2 Rapid Antigen Test in Pediatric Population. *Pediatr Infect Dis J* Published Online First: 2021. doi:10.1097/INF.0000000000003101

- 5 Homza M, Zelena H, Janosek J, *et al.* Covid-19 antigen testing: better than we know? A test accuracy study. *Infect Dis (Lond)* 2021;**53**:661–8. doi:10.1080/23744235.2021.1914857
- 6 Kiyasu Y, Takeuchi Y, Akashi Y, *et al.* Prospective analytical performance evaluation of the QuickNavi™-COVID19 Ag for asymptomatic individuals. *medRxiv* 2021;:2021.04.01.21254813. doi:10.1101/2021.04.01.21254813
- 7 L’Huillier A, Lacour M, Sadiku D, *et al.* Diagnostic accuracy of SARS-CoV-2 rapid antigen detection testing in symptomatic and asymptomatic children in the clinical setting. *medRxiv* 2021;:2021.04.15.21255577. doi:10.1101/2021.04.15.21255577
- 8 Möckel M, Corman VM, Stegemann MS, *et al.* SARS-CoV-2 antigen rapid immunoassay for diagnosis of COVID-19 in the emergency department. *Biomarkers* 2021;**26**:213–20. doi:10.1080/1354750X.2021.1876769
- 9 Pilarowski G, Marquez C, Rubio L, *et al.* Field performance and public health response using the BinaxNOW™ Rapid SARS-CoV-2 antigen detection assay during community-based testing. *Clinical Infectious Diseases* Published Online First: 26 December 2020. doi:10.1093/cid/cia1890
- 10 Pollock NR, Jacobs JR, Tran K, *et al.* Performance and Implementation Evaluation of the Abbott BinaxNOW Rapid Antigen Test in a High-throughput Drive-through Community Testing Site in Massachusetts. *Journal of Clinical Microbiology* Published Online First: 23 February 2021. doi:10.1128/JCM.00083-21
- 11 Pollock NR, Tran K, Jacobs JR, *et al.* Performance and Operational Evaluation of the Access Bio CareStart Rapid Antigen Test in a High-throughput Drive-through Community Testing Site in Massachusetts. *medRxiv* 2021;:2021.03.07.21253101. doi:10.1101/2021.03.07.21253101
- 12 Prince-Guerra JL, Almendares O, Nolen LD, *et al.* Evaluation of Abbott BinaxNOW Rapid Antigen Test for SARS-CoV-2 Infection at Two Community-Based Testing Sites - Pima County, Arizona, November 3-17, 2020. *MMWR Morb Mortal Wkly Rep* 2021;**70**:100–5. doi:10.15585/mmwr.mm7003e3
- 13 Sood N, Shetgiri R, Rodriguez A, *et al.* Evaluation of the Abbott BinaxNOW rapid antigen test for SARS-CoV-2 infection in children: Implications for screening in a school setting. *PLoS One* 2021;**16**:e0249710. doi:10.1371/journal.pone.0249710
- 14 Shah MM, Salvatore PP, Ford L, *et al.* Performance of Repeat BinaxNOW SARS-CoV-2 Antigen Testing in a Community Setting, Wisconsin, November-December 2020. *Clinical Infectious Diseases* Published Online First: 28 April 2021. doi:10.1093/cid/ciab309
- 15 Ford L, Whaley MJ, Shah MM, *et al.* Antigen Test Performance Among Children and Adults at a SARS-CoV-2 Community Testing Site. *J Pediatric Infect Dis Soc* 2021;:piab081. doi:10.1093/jpids/piab081
- 16 Takeuchi Y, Akashi Y, Kato D, *et al.* The evaluation of a newly developed antigen test (QuickNavi™-COVID19 Ag) for SARS-CoV-2: A prospective observational study in Japan. *J Infect Chemother* Published Online First: 2021. doi:10.1016/j.jiac.2021.02.029
- 17 Torres I, Poujois S, Albert E, *et al.* Evaluation of a rapid antigen test (Panbio™ COVID-19 Ag rapid test device) for SARS-CoV-2 detection in asymptomatic close contacts of COVID-19 patients. *Clinical Microbiology and Infection* 2021;**27**:636.e1-636.e4. doi:10.1016/j.cmi.2020.12.022

- 18 Villaverde S, Domínguez-Rodríguez S, Sabrido G, *et al.* Diagnostic Accuracy of the Panbio Severe Acute Respiratory Syndrome Coronavirus 2 Antigen Rapid Test Compared with Reverse-Transcriptase Polymerase Chain Reaction Testing of Nasopharyngeal Samples in the Pediatric Population. *J Pediatr* 2021;**232**:287-289.e4. doi:10.1016/j.jpeds.2021.01.027
- 19 Rutter CM, Gatsonis CA. A hierarchical regression approach to meta-analysis of diagnostic test accuracy evaluations. *Stat Med* 2001;**20**:2865–84. doi:10.1002/sim.942
